# Supplementary material
Source: publisher figshare collection journal article supplement (https://acs.figshare.com/ndownloader/files/4367131)
Supplement: Supplementary file 1 [file 4367131]

# Supporting Information

For

## Formation of a Hybrid Compound Composed of a Saddle-Distorted Tin(IV)-Porphyrin and a Keggin-Type Heteropolyoxometalate to Undergo Intramolecular Photoinduced Electron Transfer

Atsutoshi Yokoyama,<sup>†</sup> Takahiko Kojima,<sup>‡,\*</sup> Kei Ohkubo,<sup>†</sup> Motoo Shiro,<sup>§</sup> and Shunichi Fukuzumi<sup>†,£,\*</sup>

*Department of Material and Life Science, Division of Advanced Science and  
Biotechnology, Graduate School of Engineering, Osaka University, Suita, Osaka  
565-0871, Department of Chemistry, Graduate School of Pure and Applied Sciences,  
University of Tsukuba, Tsukuba, Ibaraki 305-8571, X-ray Research Laboratory, Rigaku  
Corporation, 3-9-12 Matsubara, Akishima-shi, Tokyo 196-68666, Japan, and  
Department of Bioinspired Chemistry, Ewha Womans University, Seoul 120-750, Korea*

<sup>†</sup> Osaka University.

<sup>‡</sup> University of Tsukuba.

<sup>§</sup> Rigaku Corporation

<sup>£</sup> Ewha Womans University.

\* To whom correspondence should be addressed.

E-mail: [kojima@chem.tsukuba.ac.jp](mailto:kojima@chem.tsukuba.ac.jp), [fukuzumi@chem.eng.osaka-u.ac.jp](mailto:fukuzumi@chem.eng.osaka-u.ac.jp)

**X-ray Crystallography. X-ray crystallography on **1** and **2**:** Refinements on  $F^2$  were performed for all reflections. The weighted  $R$  factor ( $R_w$ ) and goodness of fit ( $S$ ) are based on  $F^2$ , and the conventional  $R$  factor ( $R$ ) on  $F$ , with  $F$  set to zero for negative  $F^2$ . The threshold expression of  $F^2 > 2\sigma(F^2)$  was used only for calculating  $R$  factors (gt) etc. and was not relevant to the choice of reflections for refinement.  $R$  factors based on  $F^2$  are statistically about twice as large as those based on  $F$ , and  $R$  factors based on all data are even larger. Since the methanol molecule in **2** was disordered, its carbon atom was refined isotropically with occupancies of 0.5. Crystallographic data are summarized in Table S1.

**Table S1.** X-ray Crystallographic Data for **1** and **2**

|                                                                        | <b>1</b>                                                                         | <b>2</b>                                                          |
|------------------------------------------------------------------------|----------------------------------------------------------------------------------|-------------------------------------------------------------------|
| Formula                                                                | C <sub>97</sub> H <sub>69</sub> Cl <sub>5</sub> N <sub>4</sub> O <sub>4</sub> Sn | C <sub>100</sub> H <sub>80</sub> N <sub>4</sub> O <sub>8</sub> Sn |
| F. W.                                                                  | 1650.59                                                                          | 1584.44                                                           |
| Crystal system                                                         | monoclinic                                                                       | triclinic                                                         |
| Space group                                                            | <i>P</i> 2 <sub>1</sub> / <i>n</i>                                               | <i>P</i> −1                                                       |
| <i>T</i> , K                                                           | 183                                                                              | 180                                                               |
| <i>a</i> , Å                                                           | 25.106(7)                                                                        | 11.4345(5)                                                        |
| <i>b</i> , Å                                                           | 16.854(4)                                                                        | 12.6971(7)                                                        |
| <i>c</i> , Å                                                           | 37.347(9)                                                                        | 14.1793(8)                                                        |
| $\alpha$ , deg                                                         | –                                                                                | 103.943(2)                                                        |
| $\beta$ , deg                                                          | 92.653(3)                                                                        | 101.911(2)                                                        |
| $\gamma$ , deg                                                         | –                                                                                | 93.635(2)                                                         |
| <i>V</i> , Å <sup>3</sup>                                              | 15786(7)                                                                         | 1941.0(2)                                                         |
| <i>Z</i>                                                               | 8                                                                                | 1                                                                 |
| No. of reflections                                                     | 104400                                                                           | 15908                                                             |
| No. of observations                                                    | 28696                                                                            | 8777                                                              |
| No. of parameters                                                      | 2016                                                                             | 511                                                               |
| <i>R</i> 1 <sup><i>a</i></sup> ( <i>I</i> > 2.0 $\sigma$ ( <i>I</i> )) | 0.087                                                                            | 0.039                                                             |
| <i>R</i> <sub>w</sub> <sup><i>b</i></sup> (all data)                   | 0.182                                                                            | 0.097                                                             |
| GOF                                                                    | 1.096                                                                            | 1.080                                                             |

$$^a R1 = \sum ||F_o| - |F_c|| / \sum |F_o|.$$

$$^b R_w = [\sum (w(F_o^2 - F_c^2)^2) / \sum w(F_o^2)^2]^{1/2}.$$



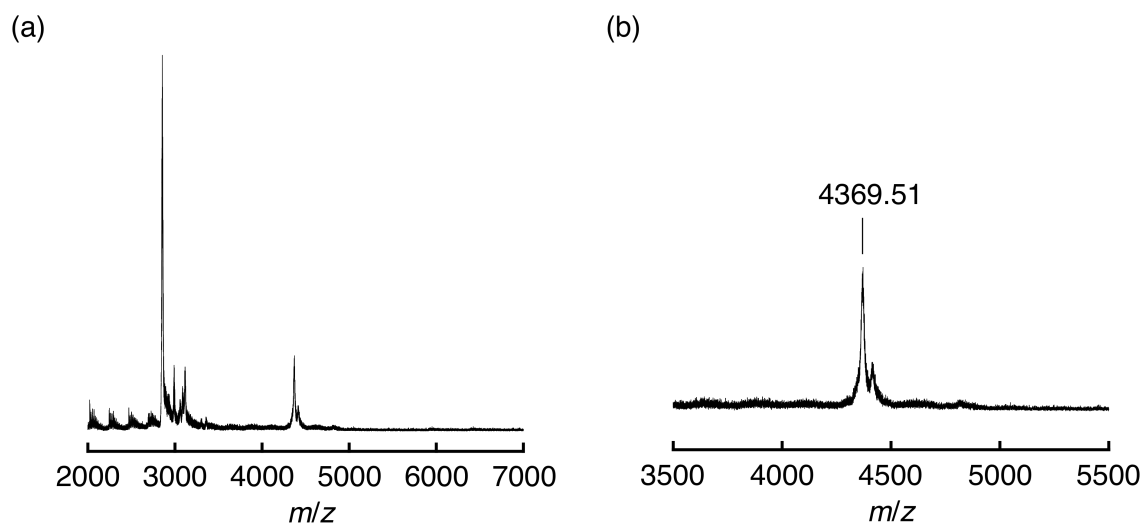

**Figure S2.** Full range of MALDI-TOF-MS spectrum of conglomerate made of **2** and **3** ( $m/z = 4369.51$ ) in  $\text{CH}_2\text{Cl}_2$  (linear negative mode, matrix =  $\alpha$ -cyano-4-hydroxycinnamic acid (CHCA)).

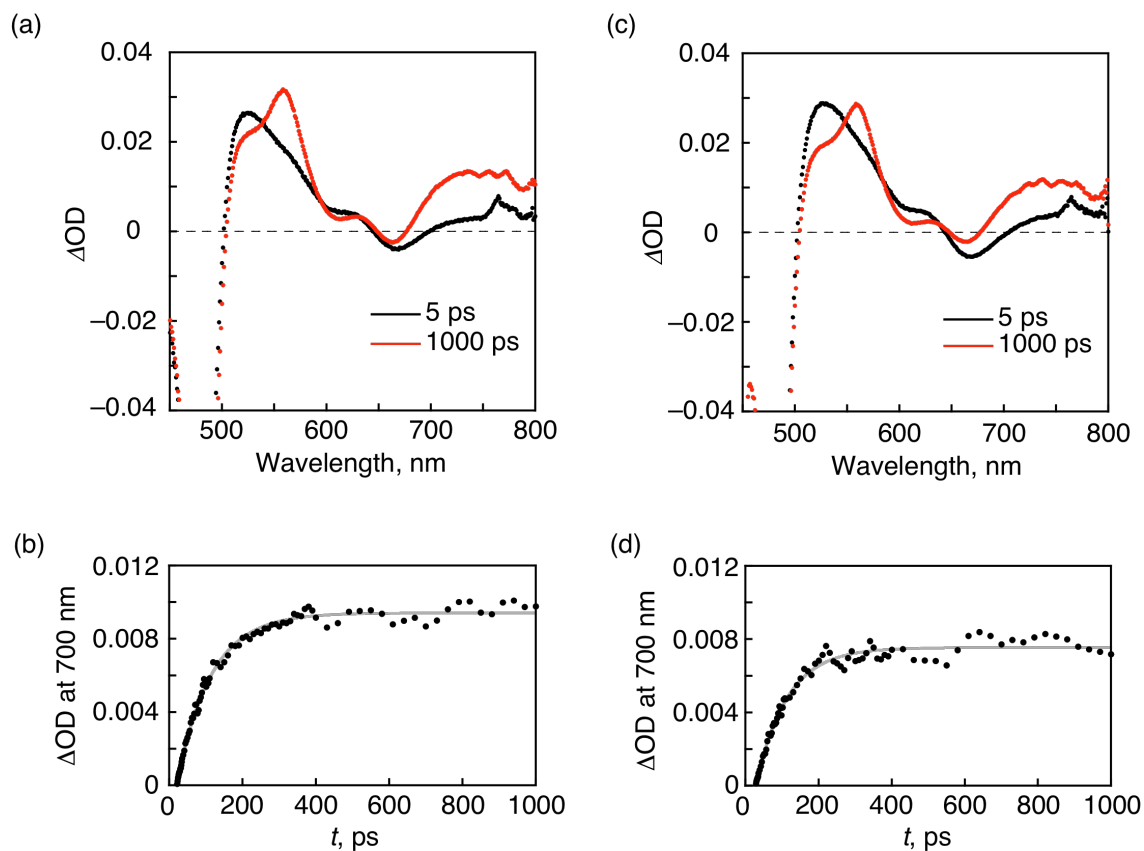

**Figure S3.** (a) Femtosecond transient absorption spectra of **1** ( $4.0 \times 10^{-5}$  M) at 5 (black) and 1000 ps (red) after laser excitation at 430 nm and (b) time profile of  $\Delta OD$  at 700 nm. (c) Femtosecond transient absorption spectra of **1** ( $4.0 \times 10^{-5}$  M) with **3** ( $1.2 \times 10^{-2}$  M) at 5 (black) and 1000 ps (red) after laser excitation at 430 nm and (b) time profile of  $\Delta OD$  at 700 nm.
